# Supplementary figures and images for: Does dog acquisition improve physical activity, sedentary behaviour and biological markers of cardiometabolic health? Results from a three-arm controlled study
Source: PubMed Central journal article supplement — BMJ Open Sport Exerc Med. 2020 Apr 8;6(1):e000703. doi: 10.1136/bmjsem-2019-000703 (PMC7254141; doi:10.1136/bmjsem-2019-000703), 2020-04-08

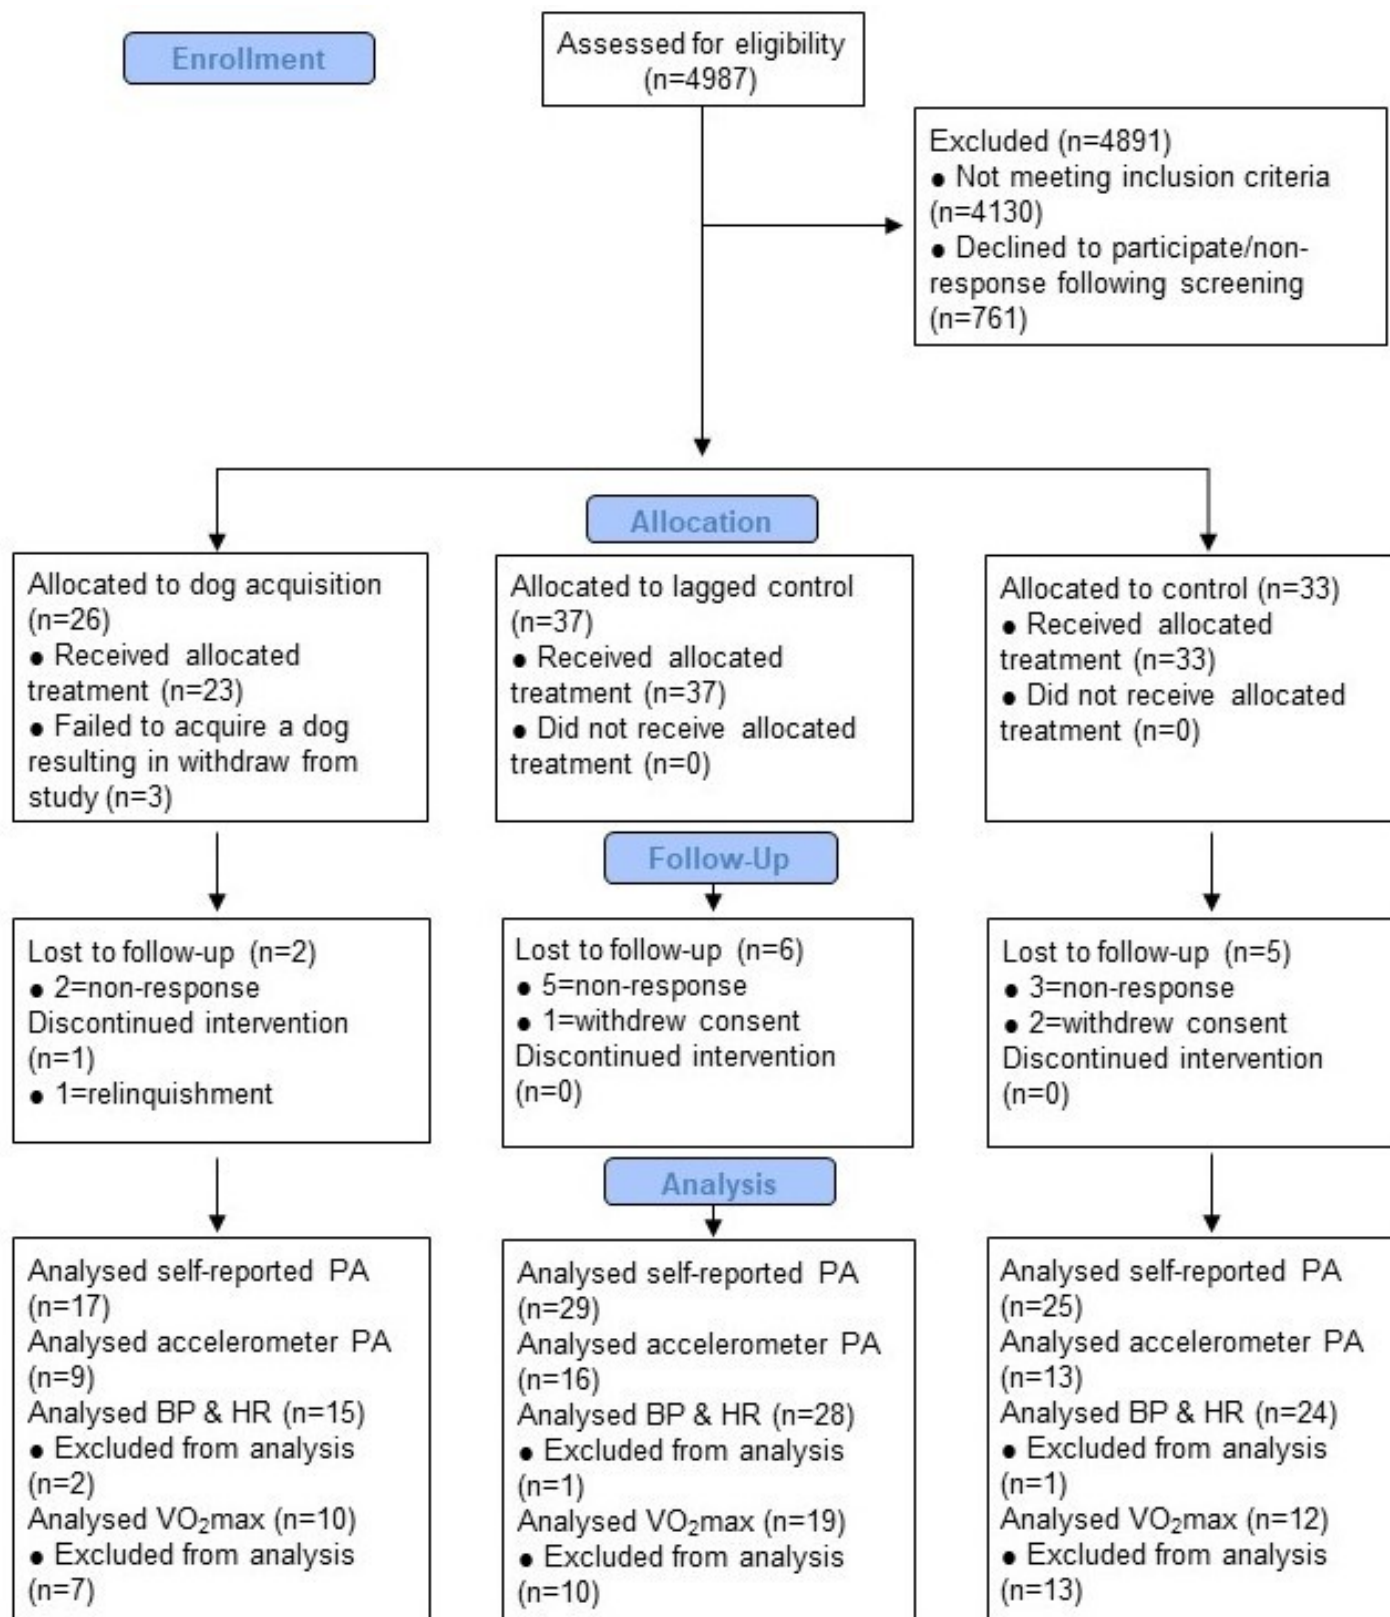

Supplement: bmjsem-2019-000703supp001.pdf [file bmjsem-2019-000703supp001.pdf]
